# Supplementary material for: CdGAP maintains podocyte function and modulates focal adhesions in a Src kinase-dependent manner
Source: PubMed Central journal article supplement (PMC9636259; doi:10.1038/s41598-022-21634-1), 2022-11-04

## **CdGAP maintains podocyte function and modulates focal adhesions in a Src kinase-dependent manner**

Jun Matsuda, Dina Greenberg, Sajida Ibrahim, Mirela Maier, Lamine Aoudjit, Jennifer Chapelle, Cindy Baldwin, Yi He, Nathalie Lamarche-Vane, Tomoko Takano

### Table of contents for supplementary information

|                         |          |
|-------------------------|----------|
| Figure S1               | Page S-2 |
| Figure S2               | Page S-3 |
| Figure S3               | Page S-4 |
| Figure S4               | Page S-5 |
| Table S1                | Page S-6 |
| Original gels and blots | Page S-7 |

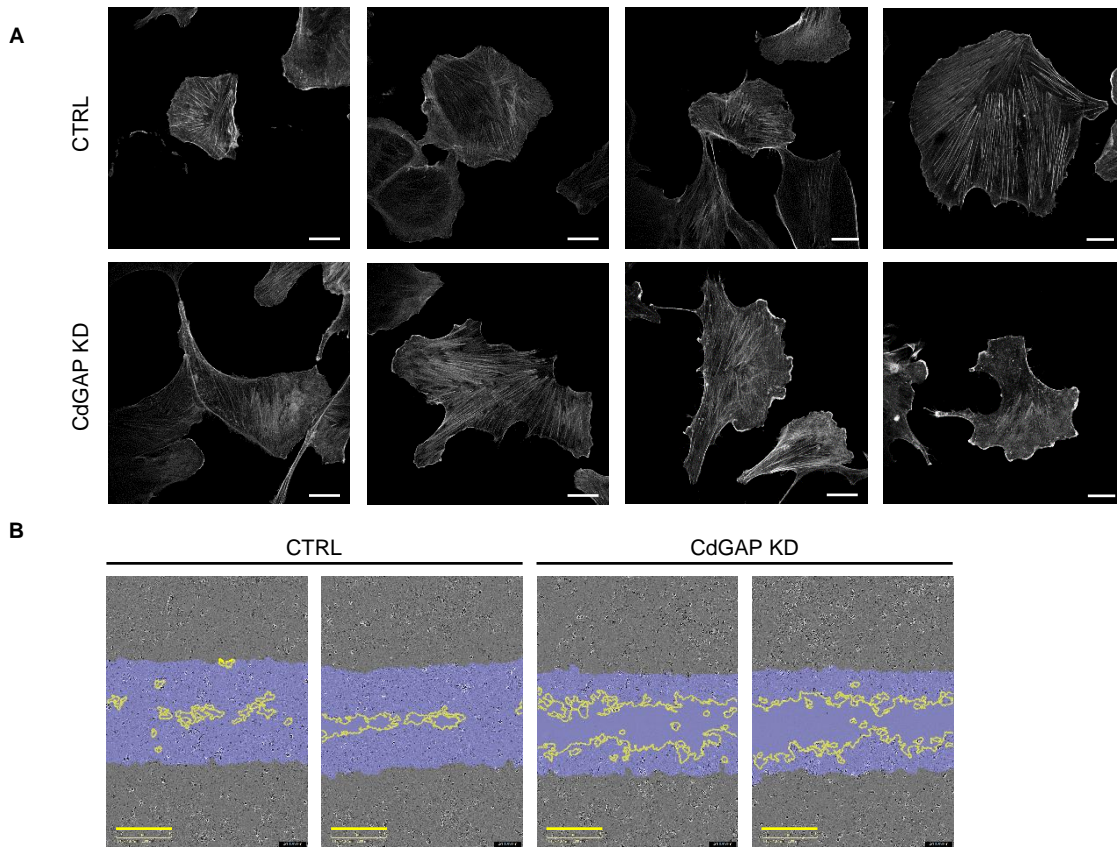

**Figure S1. CdGAP depletion alters cell morphology and migration.** (A) Immunofluorescence staining of F-actin of differentiated control (CTRL) and CdGAP KD podocytes shows altered morphology. (B) CdGAP KD cells demonstrate impaired migration in a scratch wound migration assay. Representative images of undifferentiated CTRL and CdGAP KD podocytes. Bar: 20  $\mu$ m (A), 400  $\mu$ m (B).

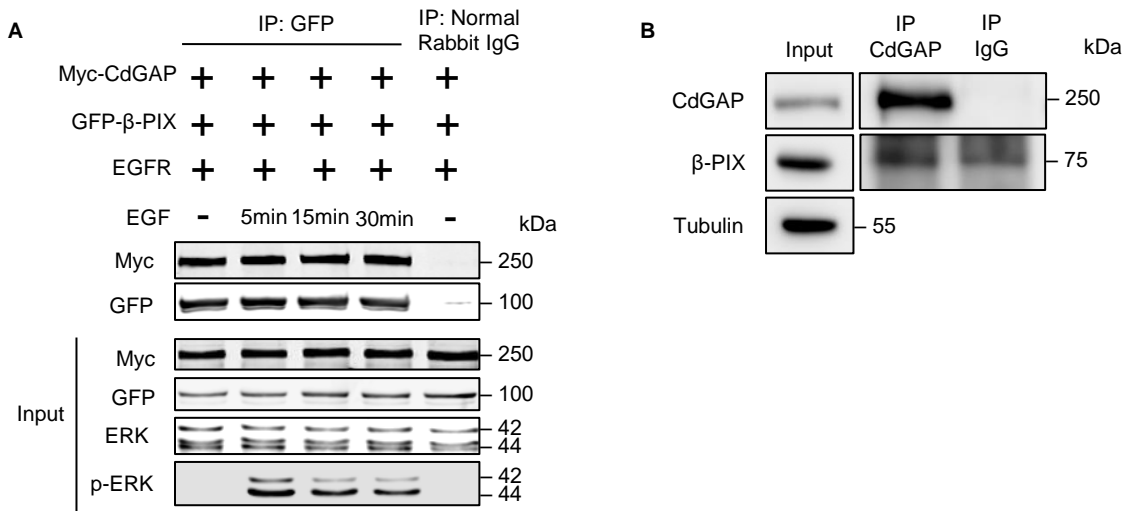

**Figure S2. CdGAP and  $\beta$ -PIX physically interact in podocytes.** (A) CdGAP and  $\beta$ -PIX interaction is not altered by EGF stimulation. HEK293 cells overexpressing myc-CdGAP and GFP- $\beta$ -PIX were untreated or treated with EGF. Cell lysates were immunoprecipitated with anti-GFP antibody (for  $\beta$ -PIX) or normal rabbit IgG followed by immunoblotting for myc (for CdGAP). (B) EGF-treated podocytes were lysed and CdGAP was immunoprecipitated (IP) from cell lysates with anti-CdGAP antibodies or rabbit anti-IgG antibodies (control) followed by immunoblotting for CdGAP and  $\beta$ -PIX. Tubulin was used as a loading control.

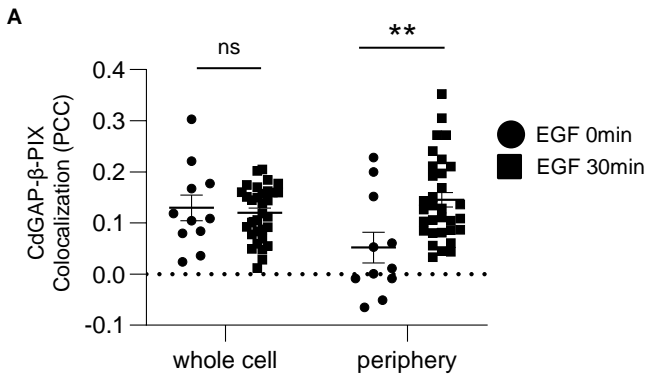

**Figure S3. EGF stimulation promotes peripheral colocalization of CdGAP and β-PIX.** (A) EGF stimulation in podocytes promotes a mild increase in peripheral colocalization of CdGAP and β-PIX. Pearson correlation coefficient (PCC) of CdGAP and β-PIX colocalization in Fig. 4A.  $n = 11$  to  $23$  in each group (A). ns, not significant. Statistically significant differences ( $**P < 0.01$ ), assessed by the Student's t-test, are indicated.

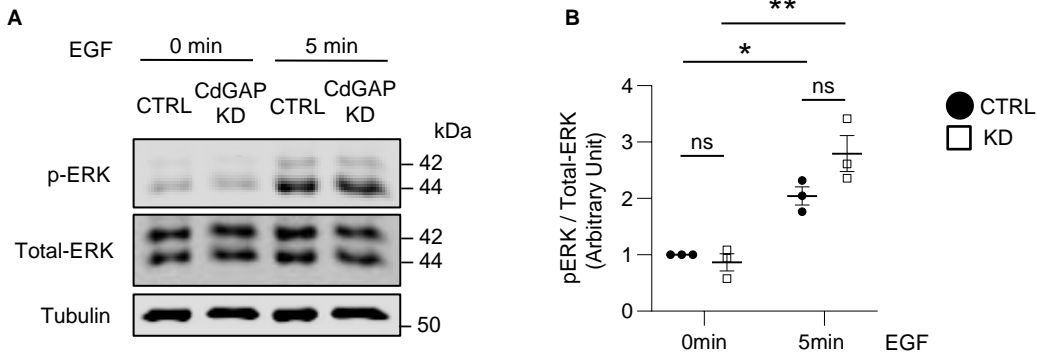

**Figure S4. ERK activation in response to EGF stimulation is not affected by CdGAP depletion.** Representative immunoblots for pERK and total ERK using CdGAP KD and CTRL podocytes treated with EGF (100 ng/ml). **(B)** Densitometric quantification of pERK normalized to total expression in **(A)**.  $n = 3$  **(B)** in each group. Statistically significant differences ( $*P < 0.05$ ,  $**P < 0.01$ ), assessed by ANOVA with the Tukey-Kramer test **(B)**, are indicated.

**Table S1.** Antibodies and Reagents.

| <b>Antibodies and Reagents</b>              | <b>Supplier and Catalog Number</b>                                                                     |
|---------------------------------------------|--------------------------------------------------------------------------------------------------------|
| Myc                                         | Santa Cruz Biotechnology, sc-40                                                                        |
| Streptavidin horseradish peroxidase (HRP)   | abcam, ab7403                                                                                          |
| Synaptopodin                                | Progen, 65194                                                                                          |
| CdGAP                                       | Sigma-Aldrich, HPA036380 for IHC, ICC and IB<br>Cell Signaling Technology (CST), 14087 for IB          |
| Tubulin                                     | Sigma-Aldrich, T5168                                                                                   |
| Epidermal growth factor (EGF)               | BioShop, E012                                                                                          |
| Rac1                                        | Millipore, 05-389                                                                                      |
| Cdc42                                       | Millipore, 05-542                                                                                      |
| Extracellular signal-regulated kinase (ERK) | CST, 9102                                                                                              |
| p-ERK                                       | CST, 9106                                                                                              |
| $\beta$ -PIX                                | Millipore, 07-1450-I for IB and ICC<br>Santa Cruz Biotechnology, sc-393184 for ICC<br>CST, 4515 for IP |
| GFP                                         | Invitrogen, A6455 for IB<br>Santa Cruz Biotechnology, sc-9996 for IB<br>Invitrogen, G10362 for IP      |
| IgG                                         | Invitrogen, 31887                                                                                      |
| mCherry                                     | CST, 43590                                                                                             |
| Phosphotyrosine                             | Millipore, 05-321                                                                                      |
| FAK                                         | BD Biosciences, 610088                                                                                 |
| pTyr397-FAK                                 | CST, 8556                                                                                              |
| paxillin                                    | Millipore, 05-417                                                                                      |
| pTyr118-paxillin                            | CST, 2541                                                                                              |
| Vinculin                                    | Sigma-Aldrich, V9131                                                                                   |
| pTyr416-Src                                 | CST, 2101                                                                                              |
| Src                                         | Millipore, 05-184                                                                                      |
| PromoFluor-647-phalloidin                   | PromoKine, PK-PF647P-7-01                                                                              |
| SU6656                                      | Millipore, 572635                                                                                      |

**Secondary antibodies**

|                                                                 |  |
|-----------------------------------------------------------------|--|
| Alexa 555-conjugated secondary anti-rabbit antibody (CST, 4413) |  |
| Alexa 488-conjugated secondary anti-mouse antibody (CST, 4408)  |  |
| HRP-conjugated secondary antibodies                             |  |
| Abcam, ab6789 [anti-mouse IgG], ab6721 [anti-rabbit IgG]        |  |
| LiCOR secondary antibodies                                      |  |
| IRDye 680LT                                                     |  |
| 926-68050 [anti-mouse]                                          |  |
| 926-68021 [anti-rabbit]                                         |  |
| IRDye 800CW                                                     |  |
| 926-32210 [anti-mouse]                                          |  |
| 926-32211 [anti-rabbit]                                         |  |

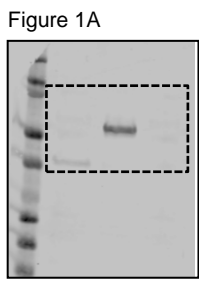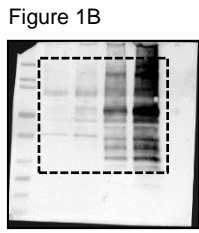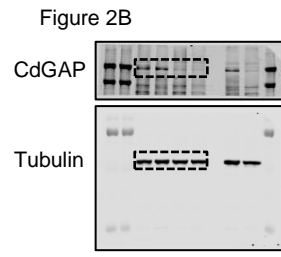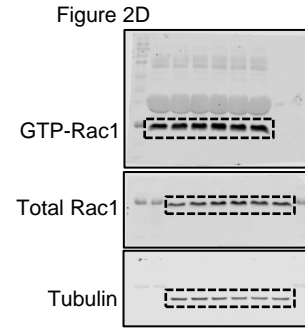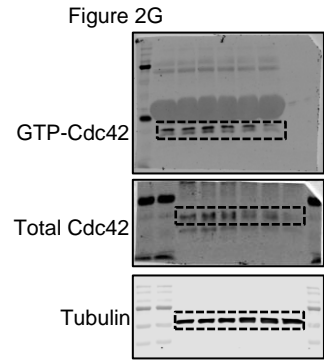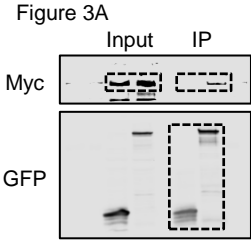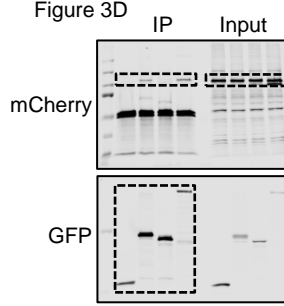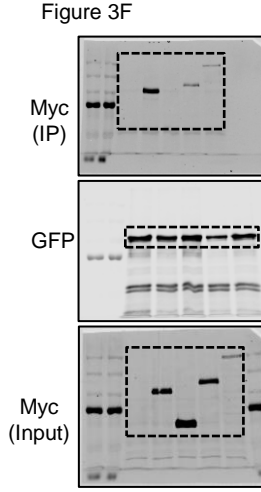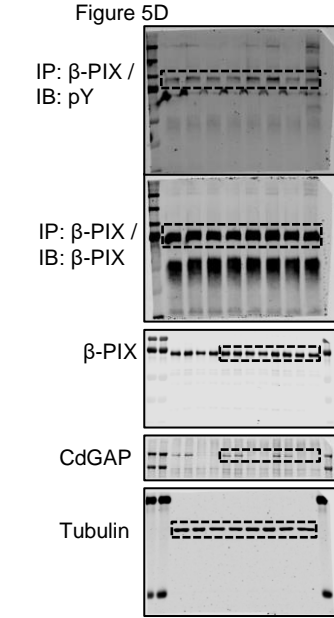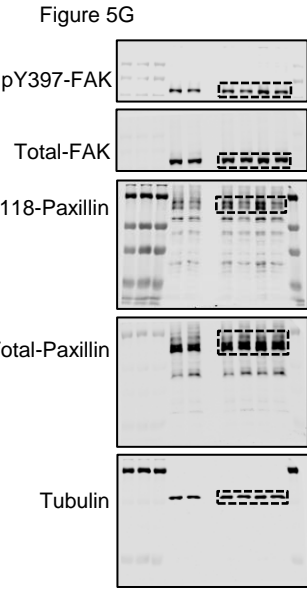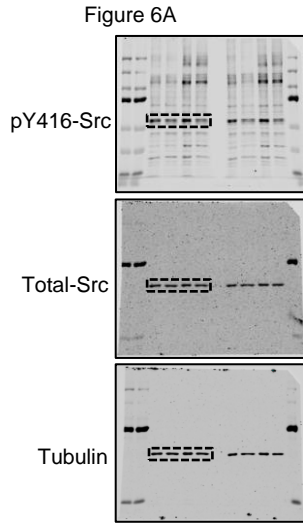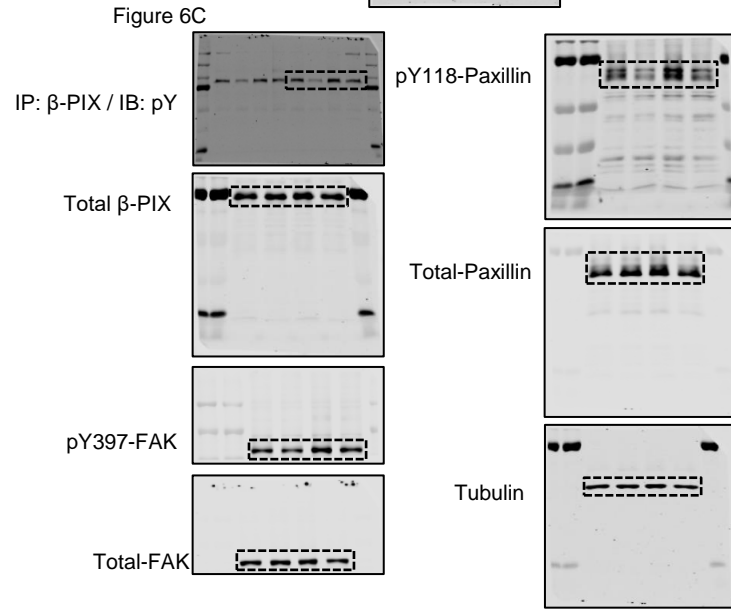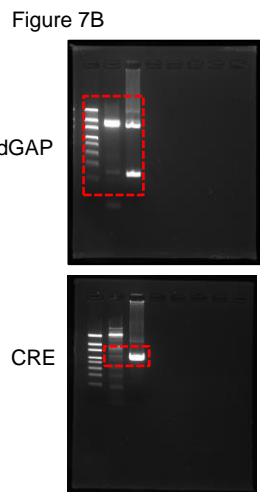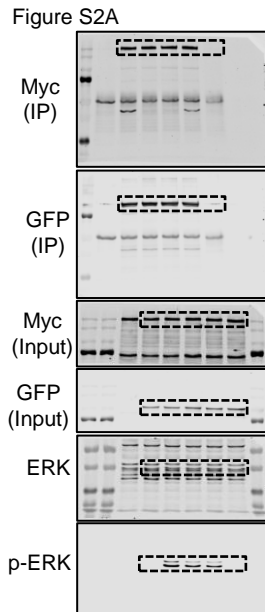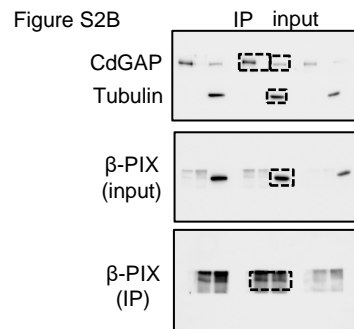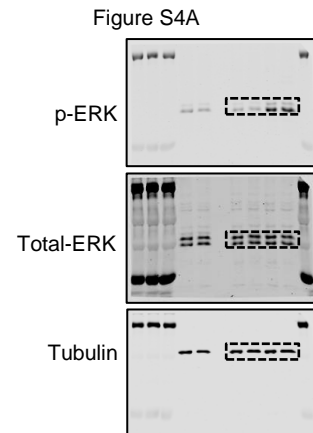

Supplement: 41598_2022_21634_MOESM1_ESM.pdf [file 41598_2022_21634_MOESM1_ESM.pdf]
